# Supplementary material for: Hearing loss in a mouse model of Muenke syndrome
Source: PubMed Central journal article supplement — Hum Mol Genet. 2008 Sep 25;18(1):43–50. doi: 10.1093/hmg/ddn311 (PMC2644644; doi:10.1093/hmg/ddn311), 2008-09-25
Supplement: ddn311_1.pdf [file ddn311_1.pdf]

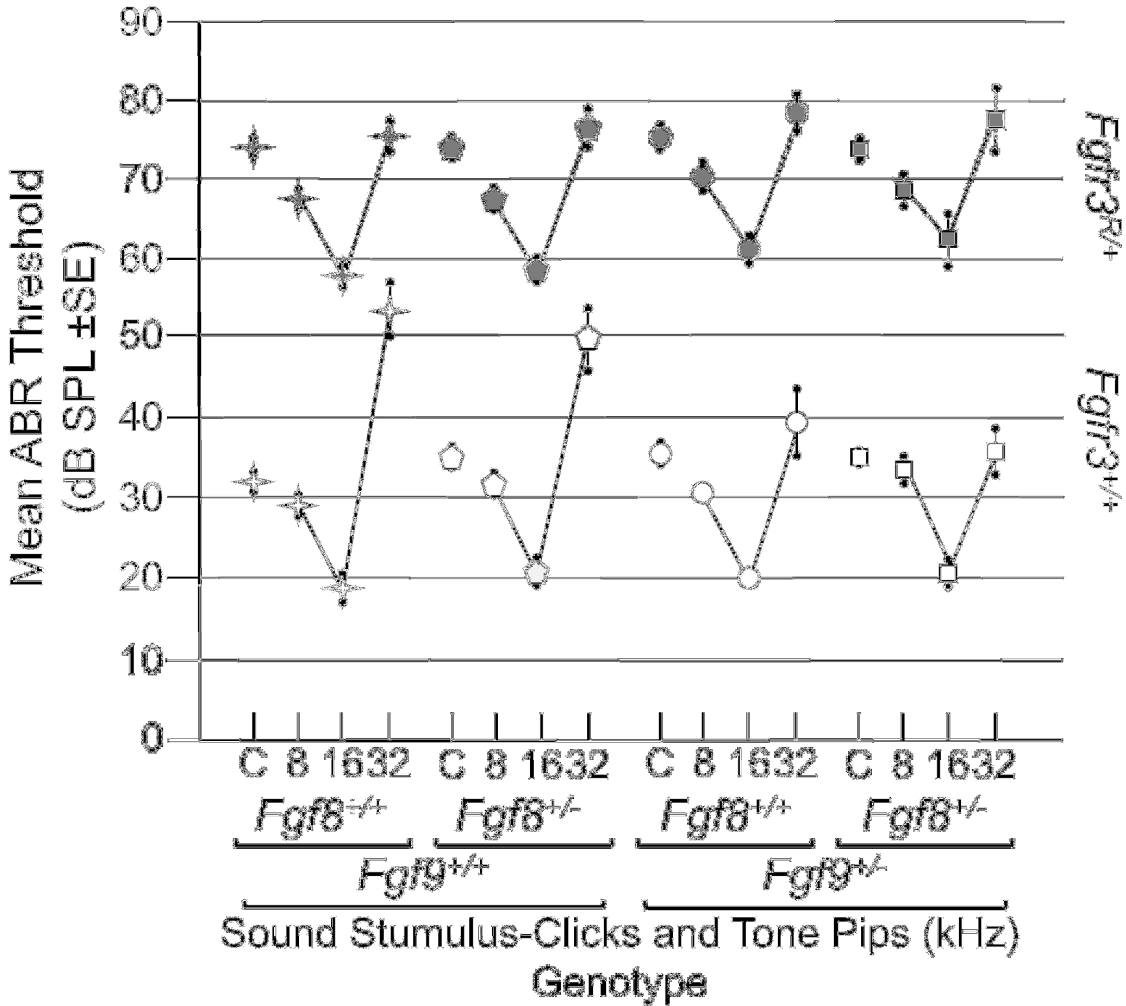

**Supplemental Figure 1. Loss of one copy of *Fgf8* or *Fgf9*, or both, does not rescue hearing in *Fgfr3<sup>P244R/+</sup>* mice.** ABR thresholds in decibels Sound Pressure Level (dB SPL)  $\pm$ SE were measured for click (C), 8 kHz, 16 kHz and 32 kHz tone pip stimuli in *Fgfr3<sup>+/+</sup>*; *Fgf8<sup>+/+</sup>*; *Fgf9<sup>+/+</sup>* (open stars), *Fgfr3<sup>+/+</sup>*; *Fgf8<sup>+/-</sup>*; *Fgf9<sup>+/+</sup>* (open pentagons), *Fgfr3<sup>+/+</sup>*; *Fgf8<sup>+/+</sup>*; *Fgf9<sup>+/-</sup>* (open circles), *Fgfr3<sup>+/+</sup>*; *Fgf8<sup>+/-</sup>*; *Fgf9<sup>+/-</sup>* (open squares) *Fgfr3<sup>R/+</sup>*; *Fgf8<sup>+/+</sup>*; *Fgf9<sup>+/+</sup>*, *Fgfr3<sup>R/+</sup>*; *Fgf8<sup>+/-</sup>*; *Fgf9<sup>+/+</sup>* (gray stars), *Fgfr3<sup>R/+</sup>*; *Fgf8<sup>+/-</sup>*; *Fgf9<sup>+/-</sup>* (gray pentagons), *Fgfr3<sup>+/+</sup>*; *Fgf8<sup>+/+</sup>*; *Fgf9<sup>+/-</sup>* (gray circles), *Fgfr3<sup>+/+</sup>*; *Fgf8<sup>+/-</sup>*; *Fgf9<sup>+/-</sup>* and (gray squares) mice. “R” symbolizes P244R.
